# Supplementary material for: Chronic Heroin Dependence Leading to Adrenal Insufficiency
Source: Case Rep Endocrinol. 2014 Aug 20;2014:461816. doi: 10.1155/2014/461816 (PMC4158160; doi:10.1155/2014/461816)
Supplement: Supplementary file 1 — Supplementary Material: Cortisol, FT3 and FT4 were assayed by electrochemilumincence competitive immunoassay method on Roche MODULAR E170 platform. Hormones like prolactin, FSH, LH, TSH and ACTH were assayed by electrochemilumincence sandwich immunoassay method on Roche MODULAR E170 platform as well. IGF-1 was assayed by Chemilumincence sandwich immunoassay technique on Immuno Diagnosic Systems iSys platform whereas serum osmolality was estimated by freezing point depression method on advanced Instruments osmometer platform. [file 461816.f1.xlsx]

## Sheet: Sheet1
Assay	Generation (if not 1st)	Method	Platform	LOD	Interassay precision (CV)	Intra assay precision (CV)
Cortisol		Electrochemilumincence competitive immunoassay	Roche MODULAR E170	0.5 nmol/L	2.2% at 124 nmol/L; 1.8% at 691 nmol/L	1.7% at129 nmol/L; 1.7% at 717 nmol/L
Prolactin	Gen II	Electrochemilumincence sandwich immunoassay	Roche MODULAR E170	1 mIU/L	1.8% at 288 mIU/L; 1.6% at 4477 mIU/L	0.8% at 182 mIU/L; 1.1% at 2314 mIU/L
FSH		Electrochemilumincence sandwich immunoassay	Roche MODULAR E170	0.1 IU/L	3.6 % at 5.33 IU/L; 4.5% at 229 IU/L	2.6 % at 5.97 IU/L; 2.5% at 178 IU/L
LH		Electrochemilumincence sandwich immunoassay	Roche MODULAR E170	0.1 IU/L	2.0 % at 5.81 IU/L; 2.2% at 159 IU/L	1.2 % at 6.15 IU/L; 0.9% at 164 IU/L
ACTH		Electrochemilumincence sandwich immunoassay	Roche MODULAR E170	1.0 ng/L	5.4% at 4.96 ng/L; 3.7% at 1444 ng/L	2.7% at 4.9 ng/L; 0.7% at 1205 ng/L
TSH		Electrochemilumincence sandwich immunoassay	Roche MODULAR E170	0.005 mIU/L	7.2% at 0.035 mIU/L; 3.3% at 3.66 mIU/L	3.0% at 0.04 mIU/L; 1.1% at 9.37 mIU/L
FT4	Gen II	Electrochemilumincence competitive immunoassay	Roche MODULAR E170	0.3 pmol/L	6.3% at 1.58 pmol/L; 3.9% at 87.8 pmol/L	5.0% at 1.58 pmol/L; 2.7% at 87.8 pmol/L
FT3	Gen III	Electrochemilumincence competitive immunoassay	Roche MODULAR E170	0.4 pmol/L	7.2% at 1.33 pmol/L; 1.9% at 46.0 pmol/L	6.5% at 1.33 pmol/L; 1.4% at 46.0 pmol/L
IGF-1		Chemilumincence sandwich immunoassay	Immuno Diagnosic Systems iSys	4.4 ug/L	5.4% at 21.9 ug/L; 5.3% at 663 ug/L	2.9% at 21.9 ug/L; 2.3% at 663 ug/L
Osmolality		Freezing point depression	Advanced Instruments Osmometer	0 mOsm/kg	0.7% at 282.9 mOsm/kg	no data available
